# Supplementary material
Source: Springer Nature journal article supplement (https://www.springermedizin.de/resource/supplementary/13063_2013_1498_MOESM4_ESM.pdf/9620168)

**Difference in costs (€)**

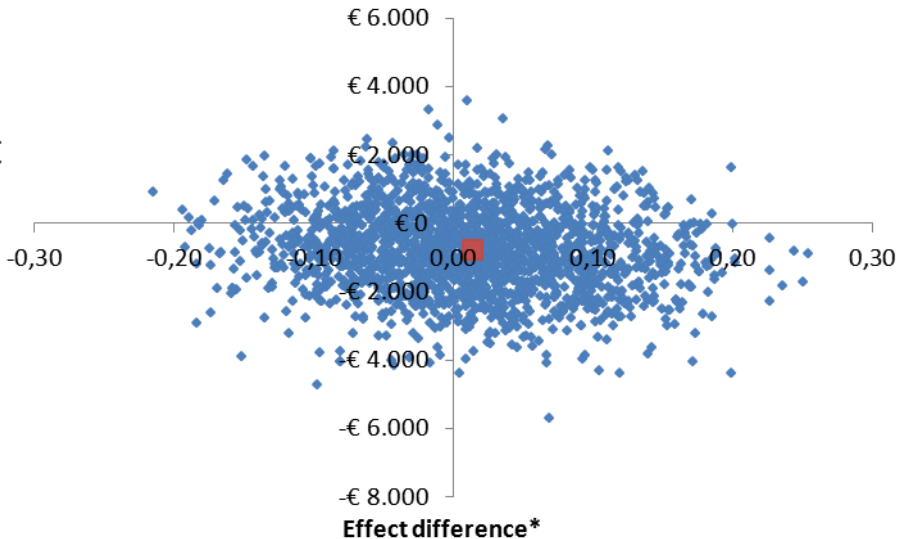

Supplement: MOESM4 [file 9620168]
